# Supplementary material
Source: publisher figshare collection journal article supplement (https://gsapubs.figshare.com/ndownloader/files/28383879)
Supplement: Supplementary file 1 [file 28383879]

Sweet, M.L., et al., 2021, How fast do submarine fans grow? Insights from the Quaternary Golo fans, offshore Corsica: Geology, v. 49, https://doi.org/10.1130/G48911.1

Table 1. Luminescence Age Information

| Core number,  Sample interval | USU num. | Num. of aliquots1 | OSL/ IRSL2 | Dose rate (Gy/ka) | Equivalent Dose3 ± 2σ (Gy) | Age ± 2σ (ka) |
| --- | --- | --- | --- | --- | --- | --- |
| Core GDEC-6: |  |  |  |  |  |  |
| 12.53-12.65 mbsf | USU-1013 | 25 (50) | OSL | 2.26 ± 0.09 | 37.70 ± 2.89 | **16.66 ± 1.64** |
| 20.10-20.20 mbsf | USU-1014 | 26 (50) | OSL | 2.04 ± 0.08 | 43.21 ± 4.73 | **21.19 ± 2.67** |
| 28.60-28.75 mbsf | USU-1015 | 26 (53) | OSL | 1.85 ± 0.07 | 41.15 ± 6.53 | **22.22 ± 3.79** |
| 34.53-34.66 mbsf | USU-1016 | 21 (62) | OSL | 1.80 ± 0.07 | 43.20 ± 9.86 | **24.03 ± 5.69** |
| 40.15-40.30 mbsf | USU-1017 | 23 (50) | OSL | 1.95 ± 0.07 | 56.52 ± 9.61 | **28.97 ± 5.25** |
| 46.50-46.65 mbsf | USU-1018 | 25 (62) | OSL | 1.69 ± 0.06 | 51.80 ± 6.03 | **36.67 ± 4.05** |
| Core GDEC-8: |  |  |  |  |  |  |
| 38.35-38.50 mbsf | USU-1007 | 15 (21) | IRSL | 3.22 ± 0.35 | 111.59 ± 6.94 | **62.12 ± 8.88** |
| 61.98-62.10 mbsf | USU-1008 | 21 (24) | IRSL | 2.58 ± 0.28 | 108.81 ± 8.07 | **65.63 ± 9.31** |
| 82.30-82.45 mbsf | USU-1009 | 22 (22) | IRSL | 2.45 ± 0.26 | 149.70 ± 14.44 | **105.1 ± 16.9** |
| 88.40-88.55 mbsf | USU-1012 | 24 (33) | IRSL | 2.34 ± 0.25 | 133.07 ± 11.74 | **103.5 ± 15.6** |
| 90.00-90.15 mbsf | USU-1010 | 28 (33) | IRSL | 2.16 ± 0.23 | 139.97 ± 5.91 | **119.1 ± 17.1** |
| 98.80-98.95 mbsf | USU-1011 | 22 (22) | IRSL | 2.17 ± 0.24 | 149.19 ± 10.10 | **126.9 ± 18.3** |

1 Number of aliquots used in age calculation and number of aliquots analyzed in parentheses.

2 Optically stimulated luminescence (OSL) age analysis using the single-aliquot regenerative-dose procedure of Murray and Wintle (2000) on 2 mm small-aliquots of quartz sand; or infrared stimulated luminescence (IRSL) age analysis at 50°C following Wallinga et al. (2000). IRSL ages corrected for fading following the methods by Auclair et al. (2003) and Huntley and Lamothe (2001).

3 Equivalent dose (DE) calculated using the Central Age Model (CAM) Galbraith and Roberts (2012).

Table 2. Dose rate information

| Lab-# | Grain size (µm) | H2O content (wt. %) | K(%) | Rb (ppm) | Th (ppm) | U (ppm) |
| --- | --- | --- | --- | --- | --- | --- |
| USU-1007 | 150-250 | 40.4 | 2.15 | 103.5 | 8.0 | 1.3 |
| USU-1008 | 75-150 | 40.4 | 1.98 | 99.4 | 5.8 | 0.8 |
| USU-1009 | 75-150 | 40.4 | 1.81 | 92.0 | 5.7 | 0.8 |
| USU-1010 | 75-150 | 40.4 | 1.42 | 71.8 | 5.5 | 0.8 |
| USU-1011 | 75-150 | 40.4 | 1.43 | 72.2 | 5.6 | 0.8 |
| USU-1012 | 150-250 | 40.4 | 1.45 | 72.6 | 5.6 | 0.8 |
| USU-1013 | 75-150 | 41.2 | 2.09 | 121.4 | 10.6 | 2.1 |
| USU-1014 | 150-250 | 36.3 | 2.08 | 113.0 | 9.1 | 1.0 |
| USU-1015 | 150-250 | 38.8 | 2.05 | 103.0 | 6.5 | 1.0 |
| USU-1016 | 150-250 | 36.3 | 2.01 | 112.0 | 5.8 | 0.8 |
| USU-1017 | 150-250 | 20.6 | 1.96 | 92.9 | 4.4 | 0.8 |
| USU-1018 | 150-250 | 43.9 | 1.91 | 103.5 | 6.2 | 1.1 |
|  |  |  |  |  |  |  |
|  |  |  |  |  |  |  |
|  |  |  |  |  |  |  |
|  |  |  |  |  |  |  |
|  |  |  |  |  |  |  |
|  |  |  |  |  |  |  |
|  |  |  |  |  |  |  |
|  |  |  |  |  |  |  |
|  |  |  |  |  |  |  |
|  |  |  |  |  |  |  |

Radial plots of Equivalent Dose (De) Distributions for OSL samples and fading corrected ages for IRSL ages. The scatter, overdispersion (OD), in data is also presented.

IRSL Age (ka)

USU-1007, OSL


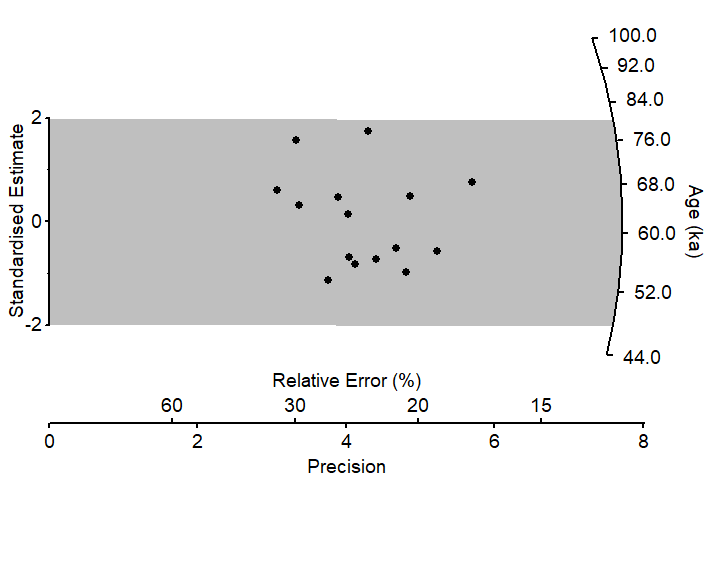
 n =15 (21)


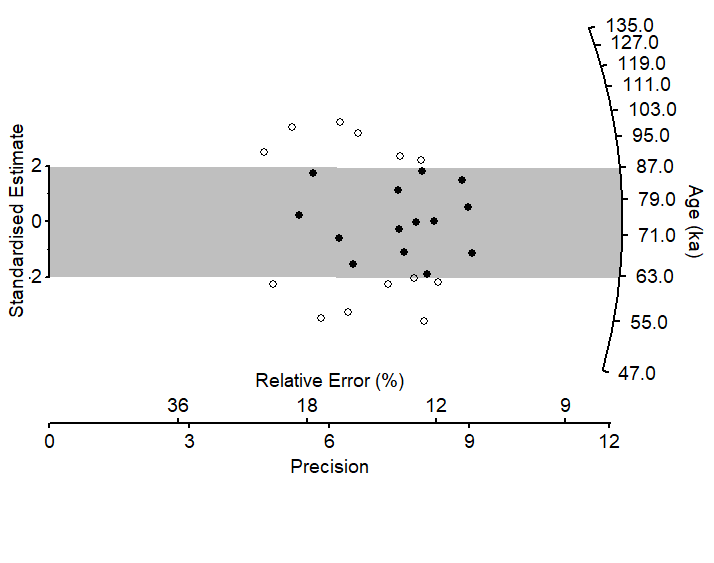


CAM

OD = 2.5%

CAM

OD = 28.7%

USU-1008, IRSL USU-1009, IRSL

n= 21 (24) n =22 (22)


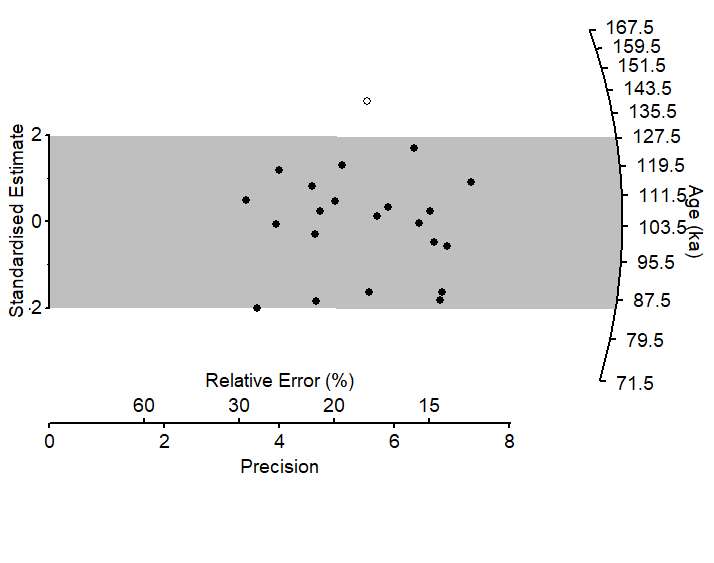

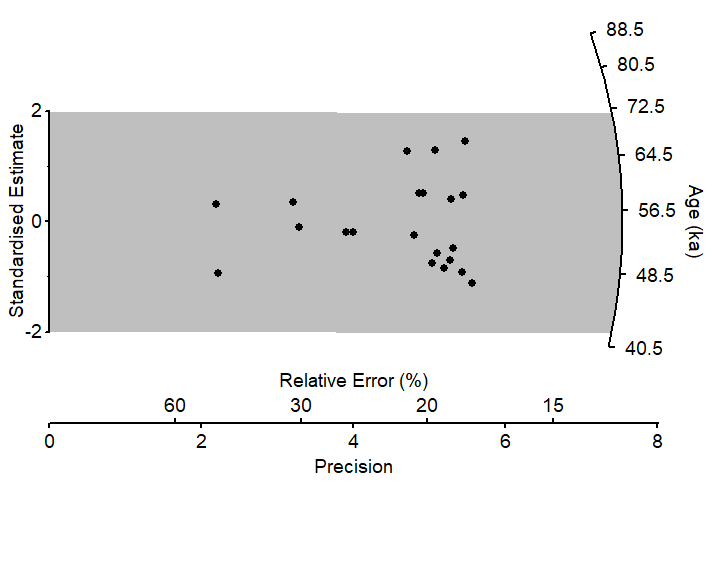


CAM

OD = 20 %

CAM

OD = 0 %

USU-1010, IRSL USU-1011, IRSL


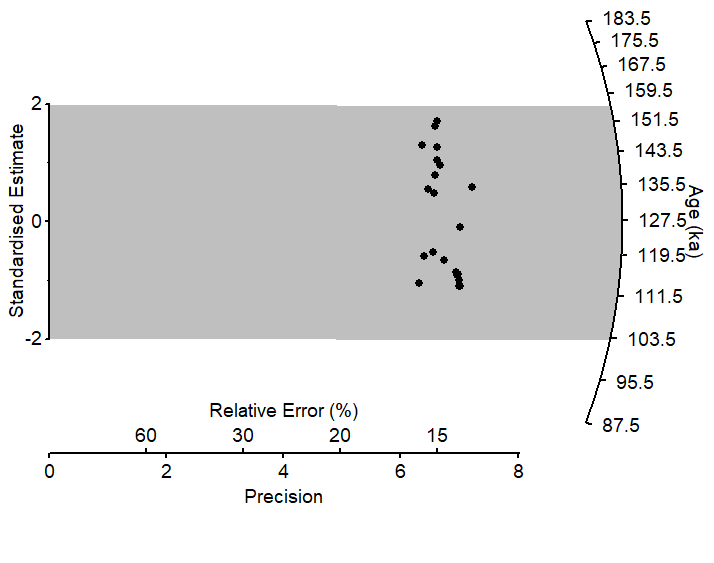
n= 32 (33) n =22 (22)


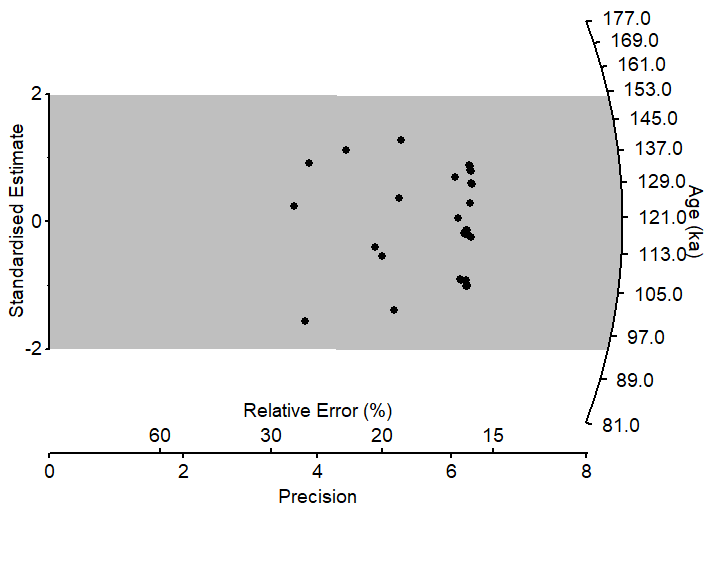


CAM

OD = 13.8 %

CAM

OD = 7.8 %

USU-1012, IRSL USU-1013, OSL

n= 30 (33) n =25 (50)


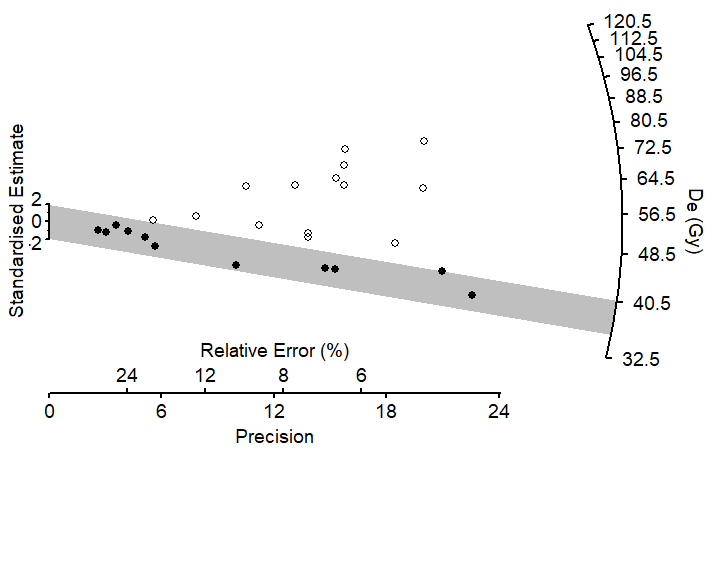

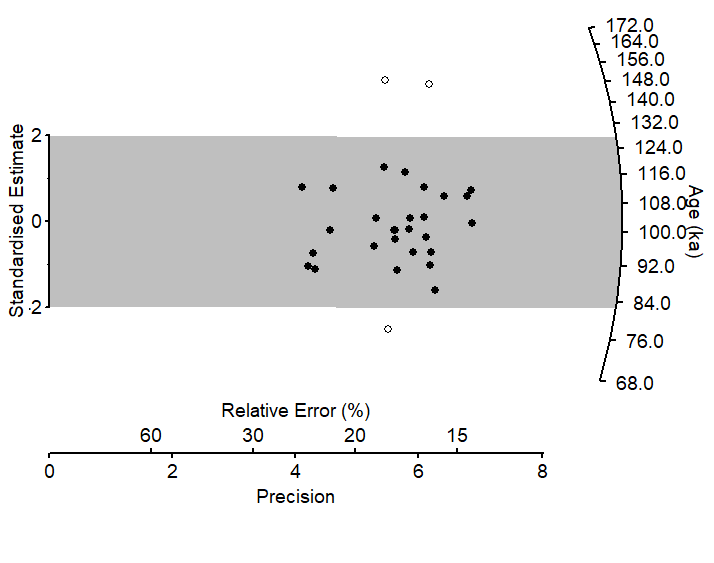


MAM

OD = 31.3 %

CAM

OD = 18.4 %


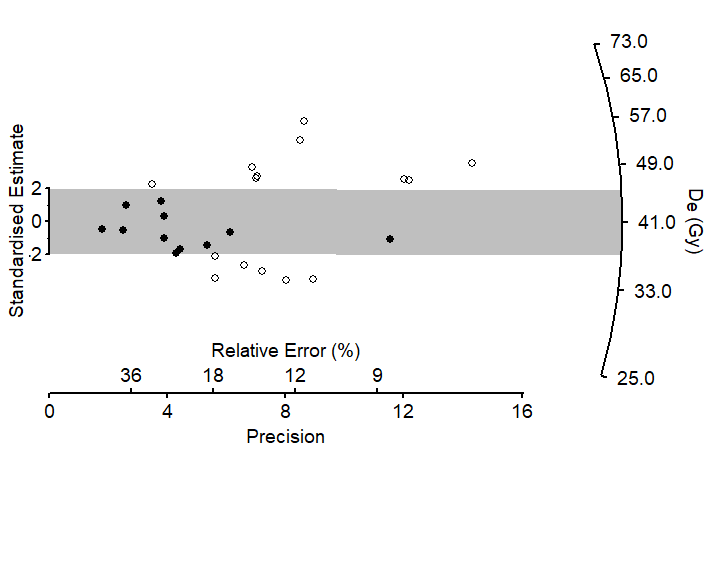
USU-1014, OSL USU-1015, OSL

n= 23 (50) n =26 (53)


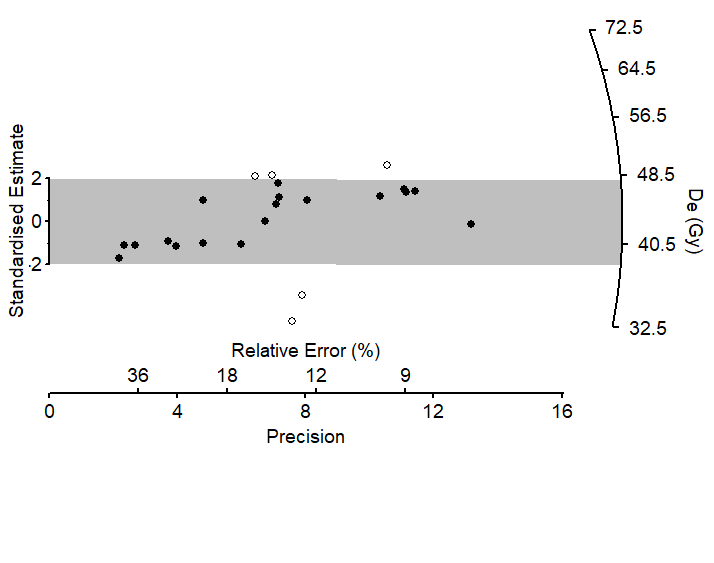


CAM

OD = 35.6 %

CAM

OD = 20.7 %

USU-1016, OSL USU-1017, OSL


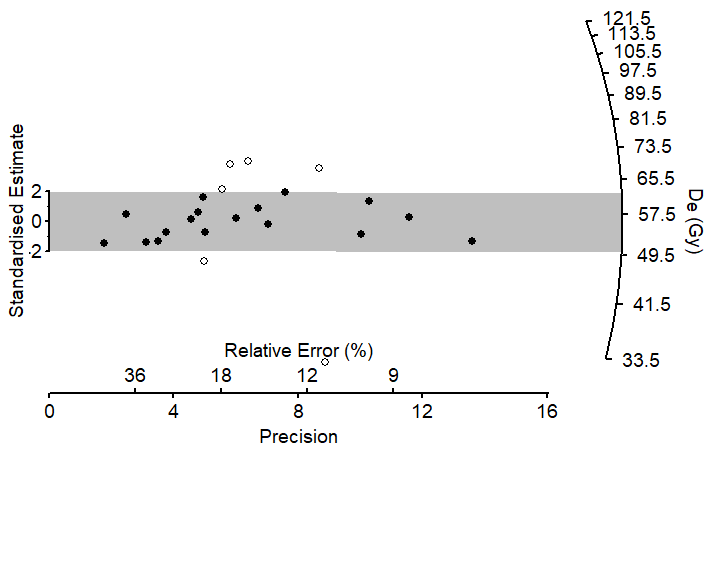
n= 21 (62) n =23 (50)


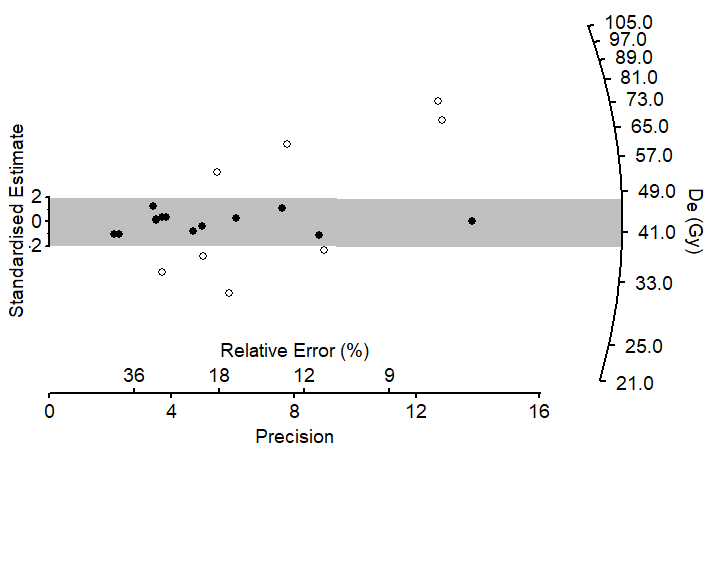


CAM

OD = 35.8 %

CAM

OD = 47.6 %

USU-1018, OSL

n= 31 (62)


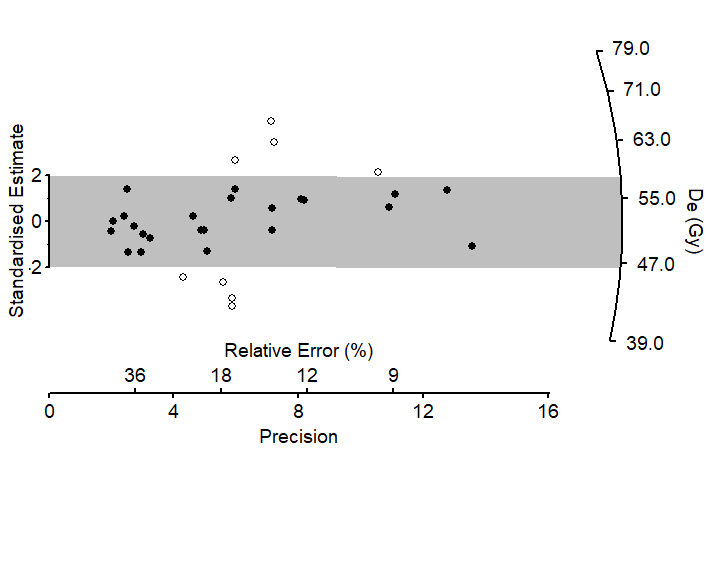


CAM

OD = 25.4 %
